# Supplementary material for: Impact of B-Ring Substitution and Acylation with Hydroxy Cinnamic Acids on the Inhibition of Porcine α-Amylase by Anthocyanin-3-Glycosides
Source: MDPI journal article supplement (doi:10.3390/foods9030367), 2020-03-21
Supplement: s1 [file s1]

## Supplemental Part:

### Impact of B-ring substitution and acylation with hydroxy cinnamic acids on the inhibition of porcine $\alpha$ -amylase by anthocyanin-3-glycosides

Julia A.H. Kaeswurm<sup>1</sup>, Lisa Könighofer<sup>1</sup>, Melanie Hogg<sup>1</sup>, Andreas Scharinger<sup>2</sup> and Maria Buchweitz<sup>1,\*</sup>

<sup>1</sup> Institute of Biochemistry and Technical Biochemistry, Department of Food Chemistry, University of Stuttgart; Germany

<sup>2</sup> Chemisches und Veterinäruntersuchungsamt Karlsruhe, Weißenburger Str. 3, 76187 Karlsruhe, Germany

\* Correspondence: e-mail: maria.buchweitz@lc.uni-stuttgart.de; phone: +49-711/68569231

#### Supplementary 1: Values for $v_{\max}$ and $K_m$ determined by two different methods

|           | optimal general fit according mixed inhibition equation (i) |                         | fit according Michaelis Menten equation for the control ([I]=0), (ii) |                         |
|-----------|-------------------------------------------------------------|-------------------------|-----------------------------------------------------------------------|-------------------------|
| inhibitor | $v_{\max}$ [ $\mu\text{M}/\text{min}$ ]                     | $K_m$ [ $\mu\text{M}$ ] | $v_{\max}$ [ $\mu\text{M}/\text{min}$ ]                               | $K_m$ [ $\mu\text{M}$ ] |
| Plg-3-glc | $0.70 \pm 0.23$                                             | $216 \pm 9$             | $0.70 \pm 0.23$                                                       | $221 \pm 13$            |
| Cyd-3-glc | $0.87 \pm 0.32$                                             | $233 \pm 5^*$           | $0.82 \pm 0.23$                                                       | $242^{**}$              |
| Dpd-3-glc | $0.88 \pm 0.12$                                             | $214 \pm 16$            | $0.87 \pm 0.11$                                                       | $214 \pm 21$            |
| Peo-3-glc | $0.80 \pm 0.13$                                             | $205 \pm 11$            | $0.79 \pm 0.11$                                                       | $208 \pm 9$             |
| MLv-3-glc | $0.79 \pm 0.20$                                             | $179 \pm 6$             | $0.79 \pm 0.18$                                                       | $188 \pm 1$             |
| average   | $0,81 \pm 0,07$                                             | $209 \pm 20$            | $0,79 \pm 0,06$                                                       | $214 \pm 20$            |

\* $K_m$  value of one day was fixed to 230, \*\* only one value is sensible, the other was not integrated in the calculation of the average. Abbr.: Plg-3-glc, pelargonidin-3-glucoside; Cyd-3-glc, cyanidin-3-glucoside; Dpd-3-glc, delphinidin-3-glucoside; Peo-3-glc, peonidin-3-glucoside; MLv-3-glc#, malvidin-3-glucoside;  $v_{\max}$ , maximum velocity;  $K_m$ , Michaelis Menten constant, [I], Inhibitor concentration.

**Supplementary 2:** Values for  $K_{ic}$  and  $K_{iu}$  fit according a Michaelis Menten fit at different inhibitor concentrations (eq. 6a,b).

|                  | <b>c</b>   | <b><math>v_{max}/v_{max}^{app}</math></b> | <b><math>K_m/K_m^{app}</math></b> | <b><math>K_{ic}</math></b> | <b>mean <math>\pm</math> SD</b> | <b><math>K_{iu}</math></b> | <b>mean <math>\pm</math> SD</b> |
|------------------|------------|-------------------------------------------|-----------------------------------|----------------------------|---------------------------------|----------------------------|---------------------------------|
|                  | [ $\mu$ M] | [ $\mu$ M/min]                            | [ $\mu$ M]                        | [ $\mu$ M]                 | [ $\mu$ M]                      | [ $\mu$ M]                 | [ $\mu$ M]                      |
| <b>Plg-glc</b>   | 0          | 0,70 $\pm$ 0,23                           | 221 $\pm$ 13                      |                            |                                 |                            |                                 |
|                  | 12,5       | 0,65 $\pm$ 0,23                           | 235 $\pm$ 2                       | 91 $\pm$ 22                | <b>69 <math>\pm</math> 19</b>   | 187 $\pm$ 64               | <b>158 <math>\pm</math> 31</b>  |
|                  | 25         | 0,58 $\pm$ 0,22                           | 258 $\pm$ 13                      | 62 $\pm$ 7                 |                                 | 126 $\pm$ 30               |                                 |
|                  | 50         | 0,53 $\pm$ 0,23                           | 325 $\pm$ 42                      | 55 $\pm$ 19                |                                 | 163 $\pm$ 64               |                                 |
| <b>Cyd-glc</b>   | 0          | 0,81 $\pm$ 0,23                           | 242*                              |                            |                                 |                            |                                 |
|                  | 12,5       | 0,79 $\pm$ 0,23                           | 244*                              | 236*                       | <b>134 <math>\pm</math> 90</b>  | 146*                       | <b>179 <math>\pm</math> 62</b>  |
|                  | 25         | 0,74 $\pm$ 0,26                           | 285*                              | 64*                        |                                 | 141*                       |                                 |
|                  | 50         | 0,69 $\pm$ 0,21                           | 300*                              | 103*                       |                                 | 250*                       |                                 |
| <b>Dpd-3-glc</b> | 0          | 0,87 $\pm$ 0,11                           | 214 $\pm$ 21                      |                            |                                 |                            |                                 |
|                  | 12,5       | 0,84 $\pm$ 0,10                           | 247 $\pm$ 33                      | 66 $\pm$ 14                | <b>63 <math>\pm</math> 3</b>    | 364 $\pm$ 13               | <b>270 <math>\pm</math> 82</b>  |
|                  | 25         | 0,79 $\pm$ 0,09                           | 273 $\pm$ 52                      | 63 $\pm$ 17                |                                 | 233 $\pm$ 25               |                                 |
|                  | 50         | 0,69 $\pm$ 0,03                           | 335 $\pm$ 129                     | 60 $\pm$ 27                |                                 | 212 $\pm$ 87               |                                 |
| <b>Peo-glc</b>   | 0          | 0,79 $\pm$ 0,10                           | 208 $\pm$ 9                       |                            |                                 |                            |                                 |
|                  | 12,5       | 0,77 $\pm$ 0,12                           | 211 $\pm$ 15                      | 180*                       | <b>133 <math>\pm</math> 40</b>  | 360*                       | <b>290 <math>\pm</math> 61</b>  |
|                  | 25         | 0,74 $\pm$ 0,14                           | 242 $\pm$ 8                       | 107 $\pm$ 15               |                                 | 250*                       |                                 |
|                  | 50         | 0,65 $\pm$ 0,05                           | 256 $\pm$ 7                       | 112 $\pm$ 45               |                                 | 262 $\pm$ 92               |                                 |
| <b>MLv-3-gl</b>  | 0          | 0,79 $\pm$ 0,18                           | 188 $\pm$ 1                       |                            |                                 |                            |                                 |
|                  | 12,5       | 0,74 $\pm$ 0,24                           | 194 $\pm$ 22                      | 139*                       | <b>83 <math>\pm</math> 52</b>   | 84*                        | <b>131 <math>\pm</math> 41</b>  |
|                  | 25         | 0,67 $\pm$ 0,16                           | 216 $\pm$ 3                       | 74 $\pm$ 1                 |                                 | 150 $\pm$ 14               |                                 |
|                  | 50         | 0,60 $\pm$ 0,20                           | 337 $\pm$ 4                       | 36 $\pm$ 6                 |                                 | 159 $\pm$ 66               |                                 |

\* only the value of one measurement was used. Abbr.: Plg-3-glc, pelargonidin-3-glucoside; Cyd-3-glc, cyanidin-3-glucoside; Dpd-3-glc, delphinidin-3-glucoside; Peo-3-glc, peonidin-3-glucoside; MLv-3-glc#, malvidin-3-glucoside;  $v_{max}$ , maximum velocity;  $K_m$ , Michealis Menten constant,  $v_{max}^{app}$ , apparent maximum velocity (calculated maximum velocity in inhibited reaction);  $K_m^{app}$ , apparent Michaelis Menten constant (calculated maximum velocity in inhibited reaction);  $K_{ic}$ , competitive inhibition constant;  $K_{iu}$ , uncompetitive inhibition constant; SD, Standard deviation.

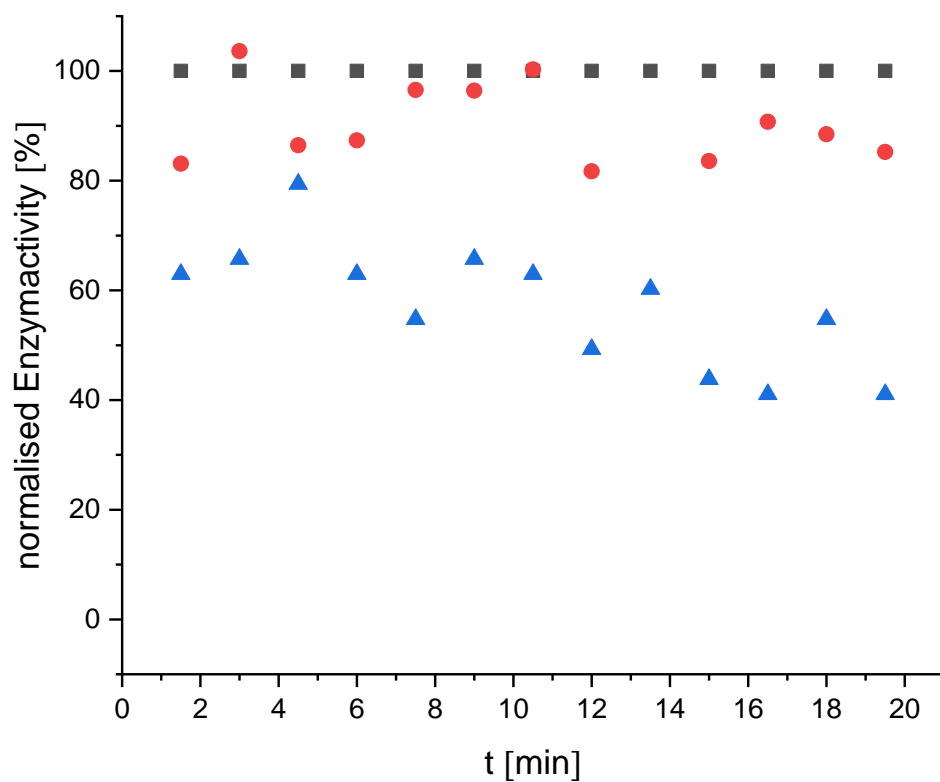

**Supplementary 3:** Normalised enzyme activity of Cydanidin-3-glucoside (● 12.5  $\mu$ M; ▲ 25  $\mu$ M) during the enzyme assay per minute based on the activity of the uninhibited reaction (■) to demonstrate the reversible inhibition type. Abbr.: t, time.

**A**

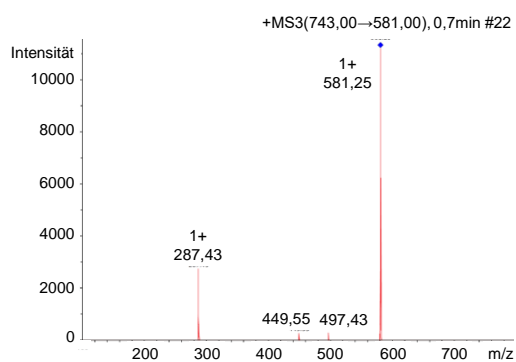

**B**

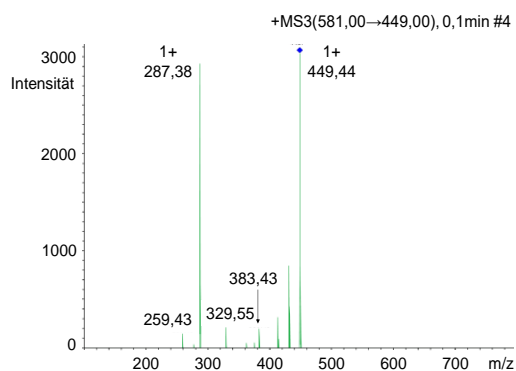

**C**

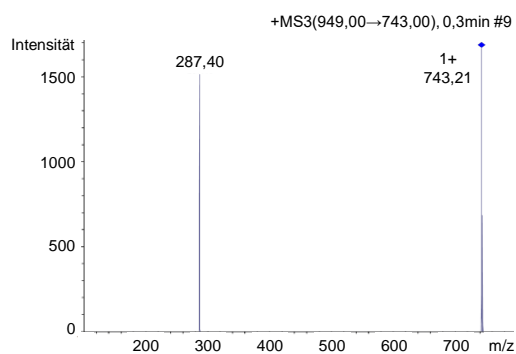

**D**

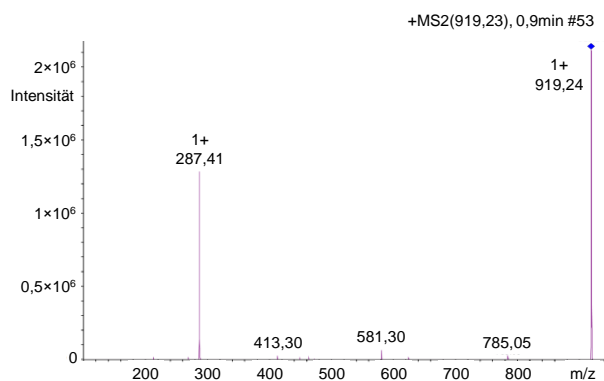

**Supplementary 4:** Individual mass spectra of the isolated compounds BC1 (A), BC2 (B), BC3 (C), BC4 (D) and respective fragments.

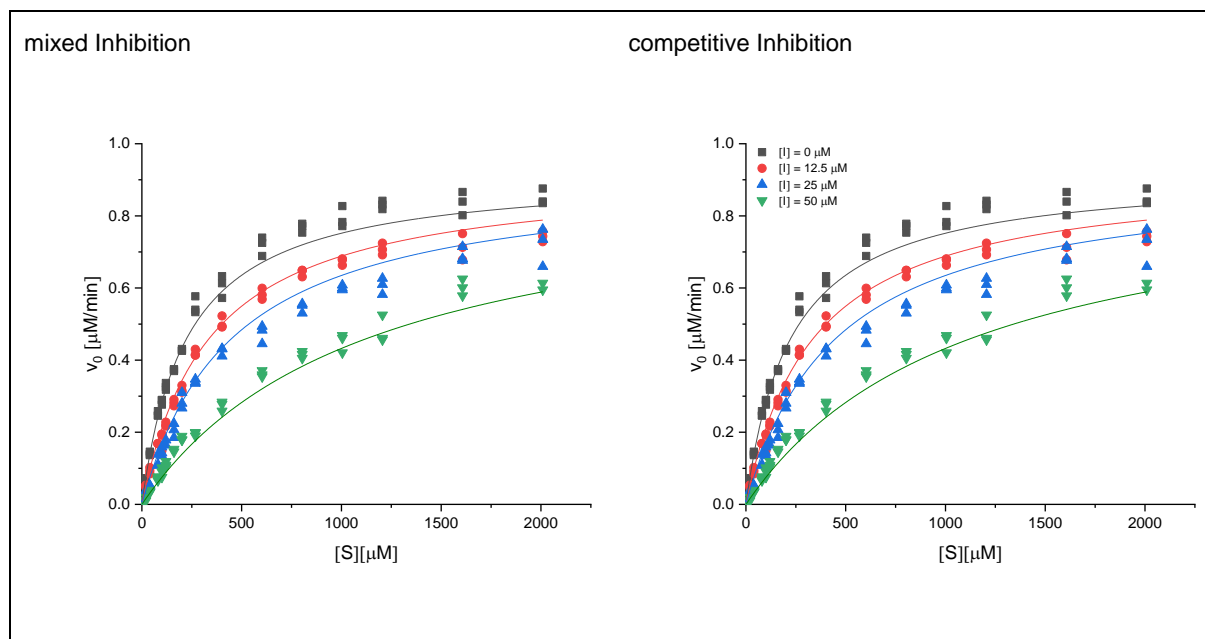

**Supplementary 5:** Plots to fit the data according the mixed (eq. 4a) and the pure competitive (eq. 4b) inhibition of. Cyd-3-gal-xyl-glc(fer).

To investigate anthocyanin stability during the enzyme activity assay, the assay preparation and the UV/Vis detection was mimicked.

The anthocyanin-3-glucosides were dissolved in 0.1% HCl (stock solution) and concentration was determined at 520 nm by UV/Vis spectroscopy as already described in the A1. The stock solution was diluted with Mes<sup>+</sup> buffer to 250, 125 and 62.5  $\mu$ M corresponding to the inhibitor solutions used. Two samples each (200  $\mu$ L) were taken after 0 and 60 min, diluted with 200  $\mu$ L 0.1% HCl and anthocyanin-3-glucosides were quantitated relatively using the HPLC method described for black carrot anthocyanin extract in the main article. The areas for the samples taken at time 0 were set to 100%. After 60 min the Inhibitor solutions were further diluted with Mes<sup>+</sup> 1:5 on the microtiter plate according to the inhibitor addition during the assay (analogous to the inhibitor concentrations of 50, 25 and 12.5  $\mu$ M used in the assay). The microtiter plate was submitted to the plate reader and the protocol for the enzyme activity assay was started (20 min, 37°C, orbital shaking done in darkness). After 20 min samples of 200  $\mu$ L were re-acidified with a similar volume of 0.1% HCl and anthocyanins were quantitated relatively to time zero by HPLC.

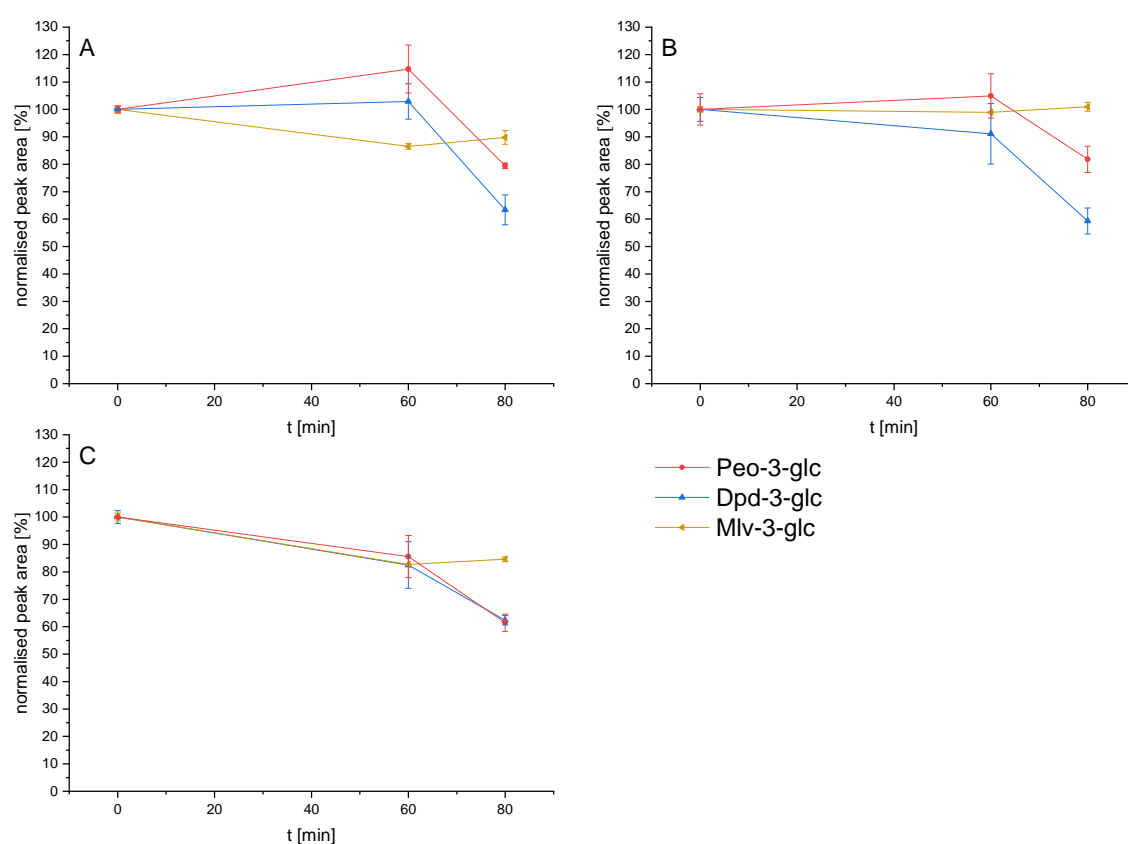

**Supplementary 6:** Anthocyanin decay during 60 min at room temperature and additional 20 min at 37°C at 12.5 (A), 25 (B) and 50  $\mu$ M (C) (determined by HPLC-DAD at 520 nm and normalised to  $t_0=100\%$ ). Abbr.: Peo-3-glc; Peonidin-3-glucoside; Dpd-3-glc, Delphinidin-3-glucosid; Mlv-3-glc, Malividin-3-glucosid; t, time.
